# Supplementary material for: A synthetic tripeptide as organogelator: elucidation of gelation mechanismElectronic supplementary information (ESI) available: the 500 MHz 1-D 1H NMR spectrum, the 500 MHz 1H–1H DQF COSY spectrum of the tripeptide in CDCl3 and the MALDI-MS spectrum of the tripeptide. See http://www.rsc.org/suppdata/p2/b1/b111598g/
Source: Royal Society of Chemistry journal article supplement (doi:10.1039/b111598g), 2002-04-22
Supplement: b111598g.doc [file b111598g.doc]

# Supplementary data


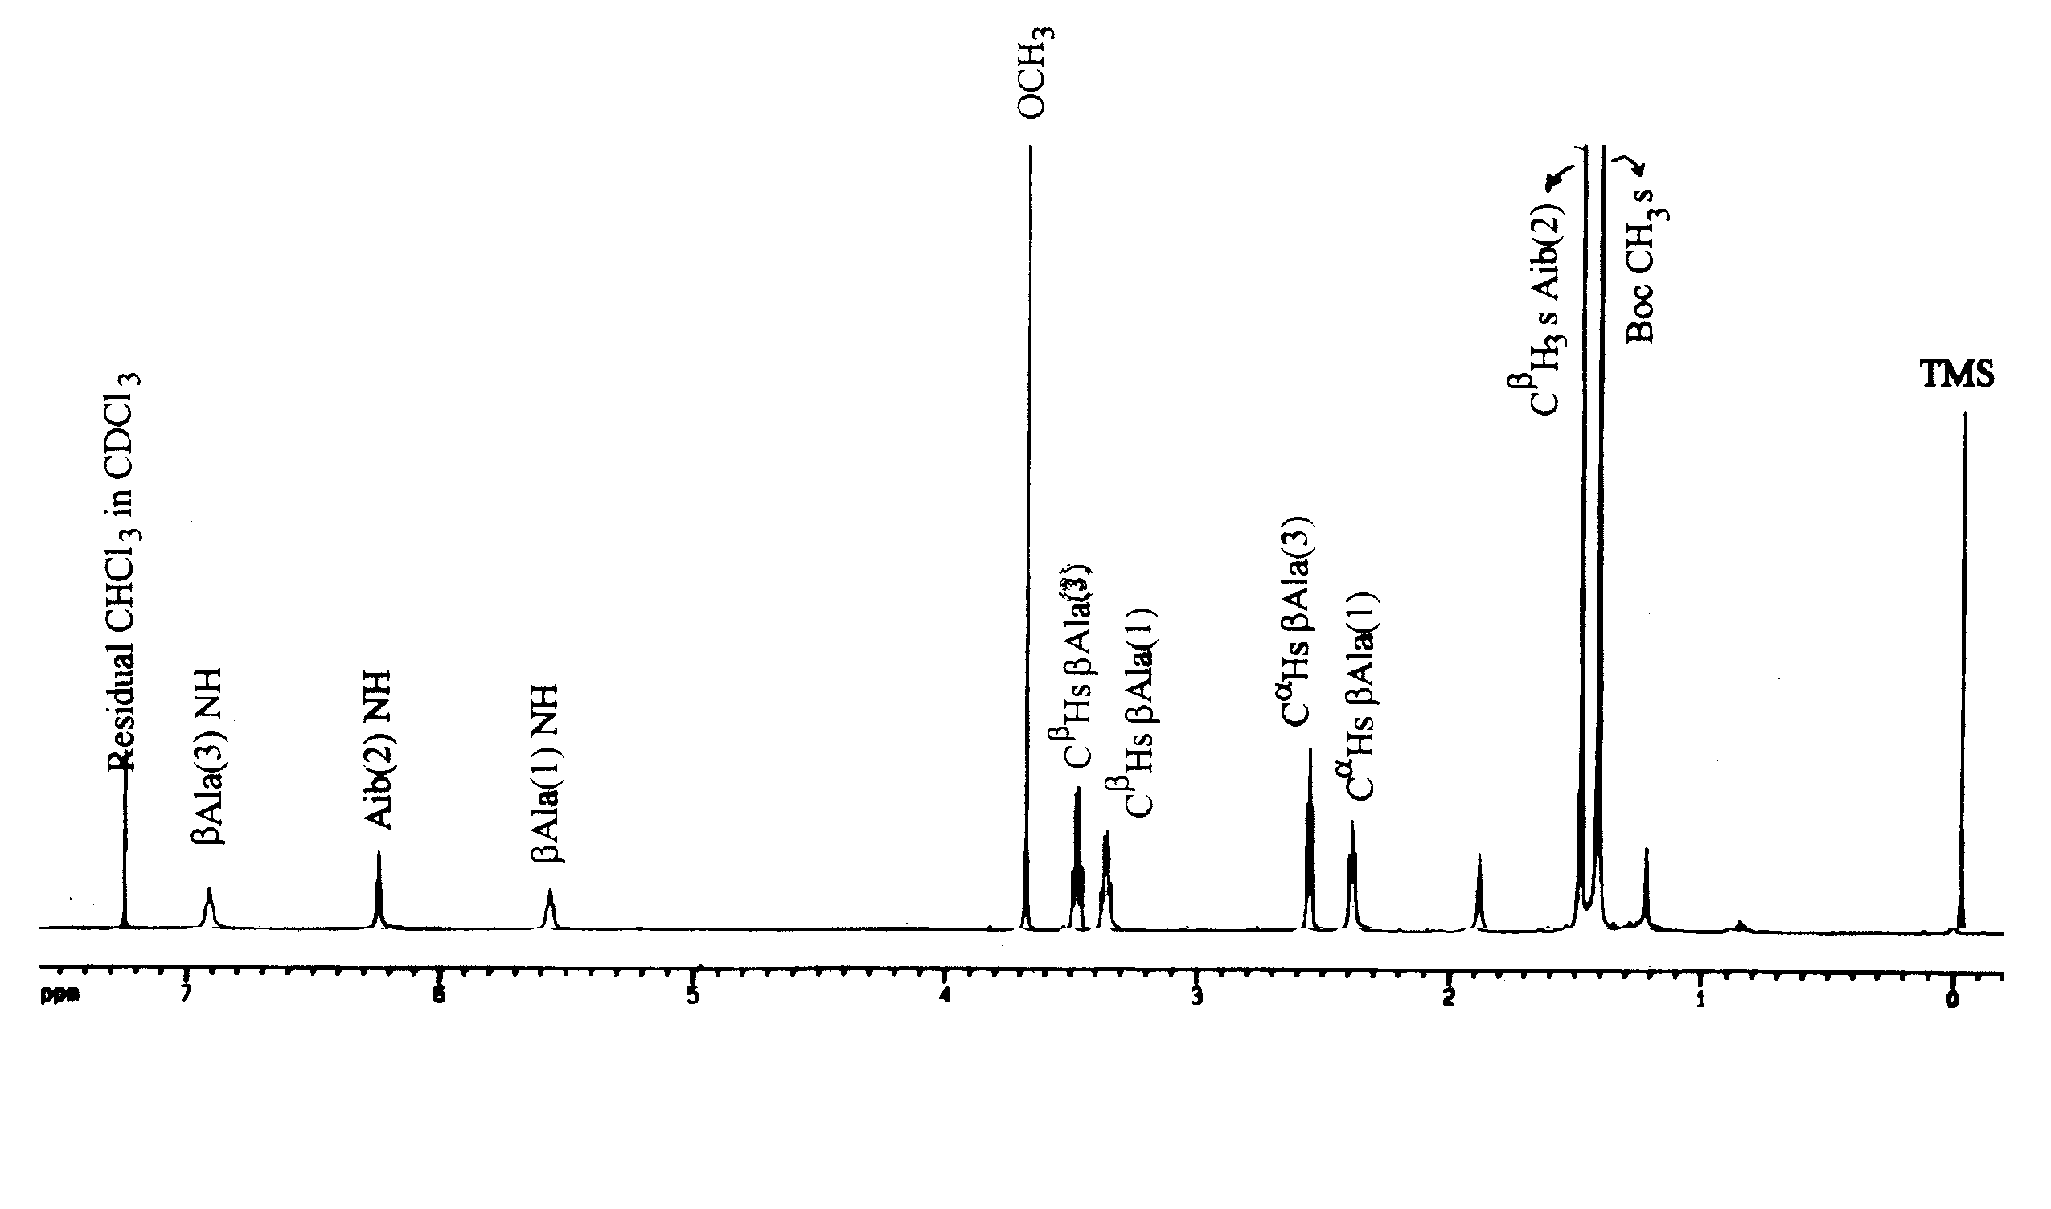


Figure 1: 500 MHZ 1H 1-D spectrum of the tripepetide in CDCl3.


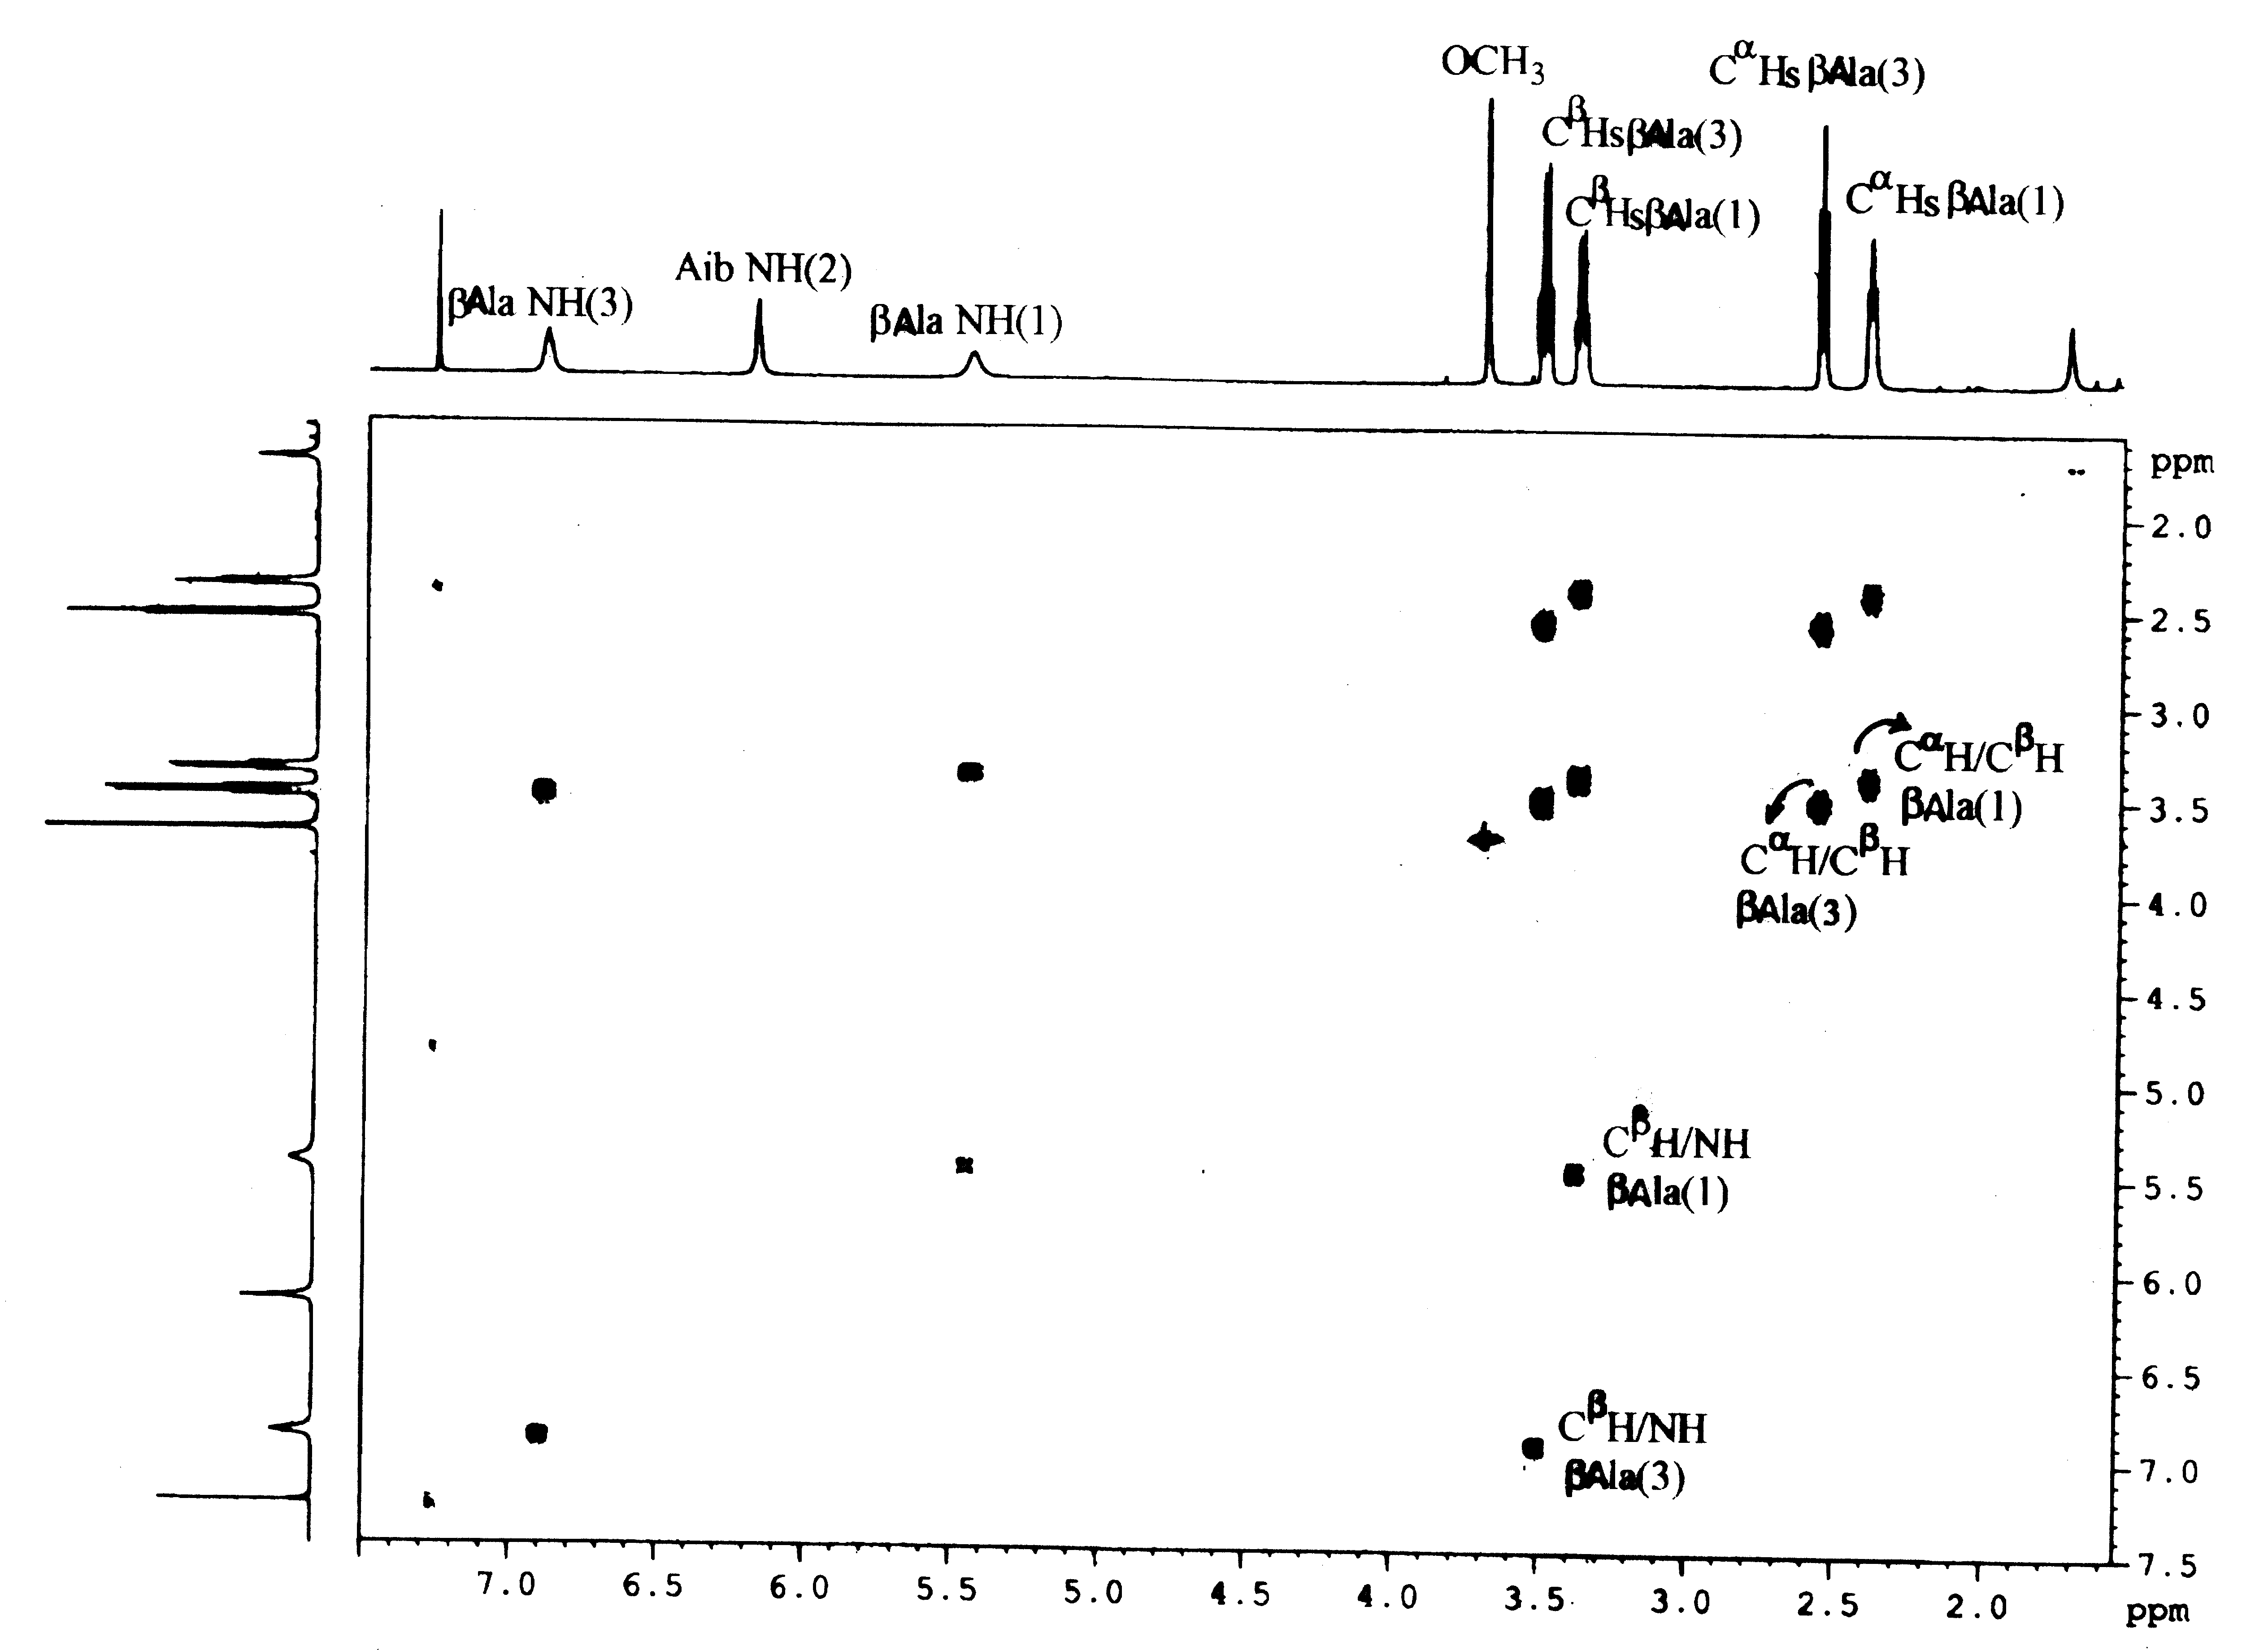


Figure 2: 500 MHZ 1H – 1H DQF COSY spectrum of the trpepetide in CDCl3 showing only selective cross peak.


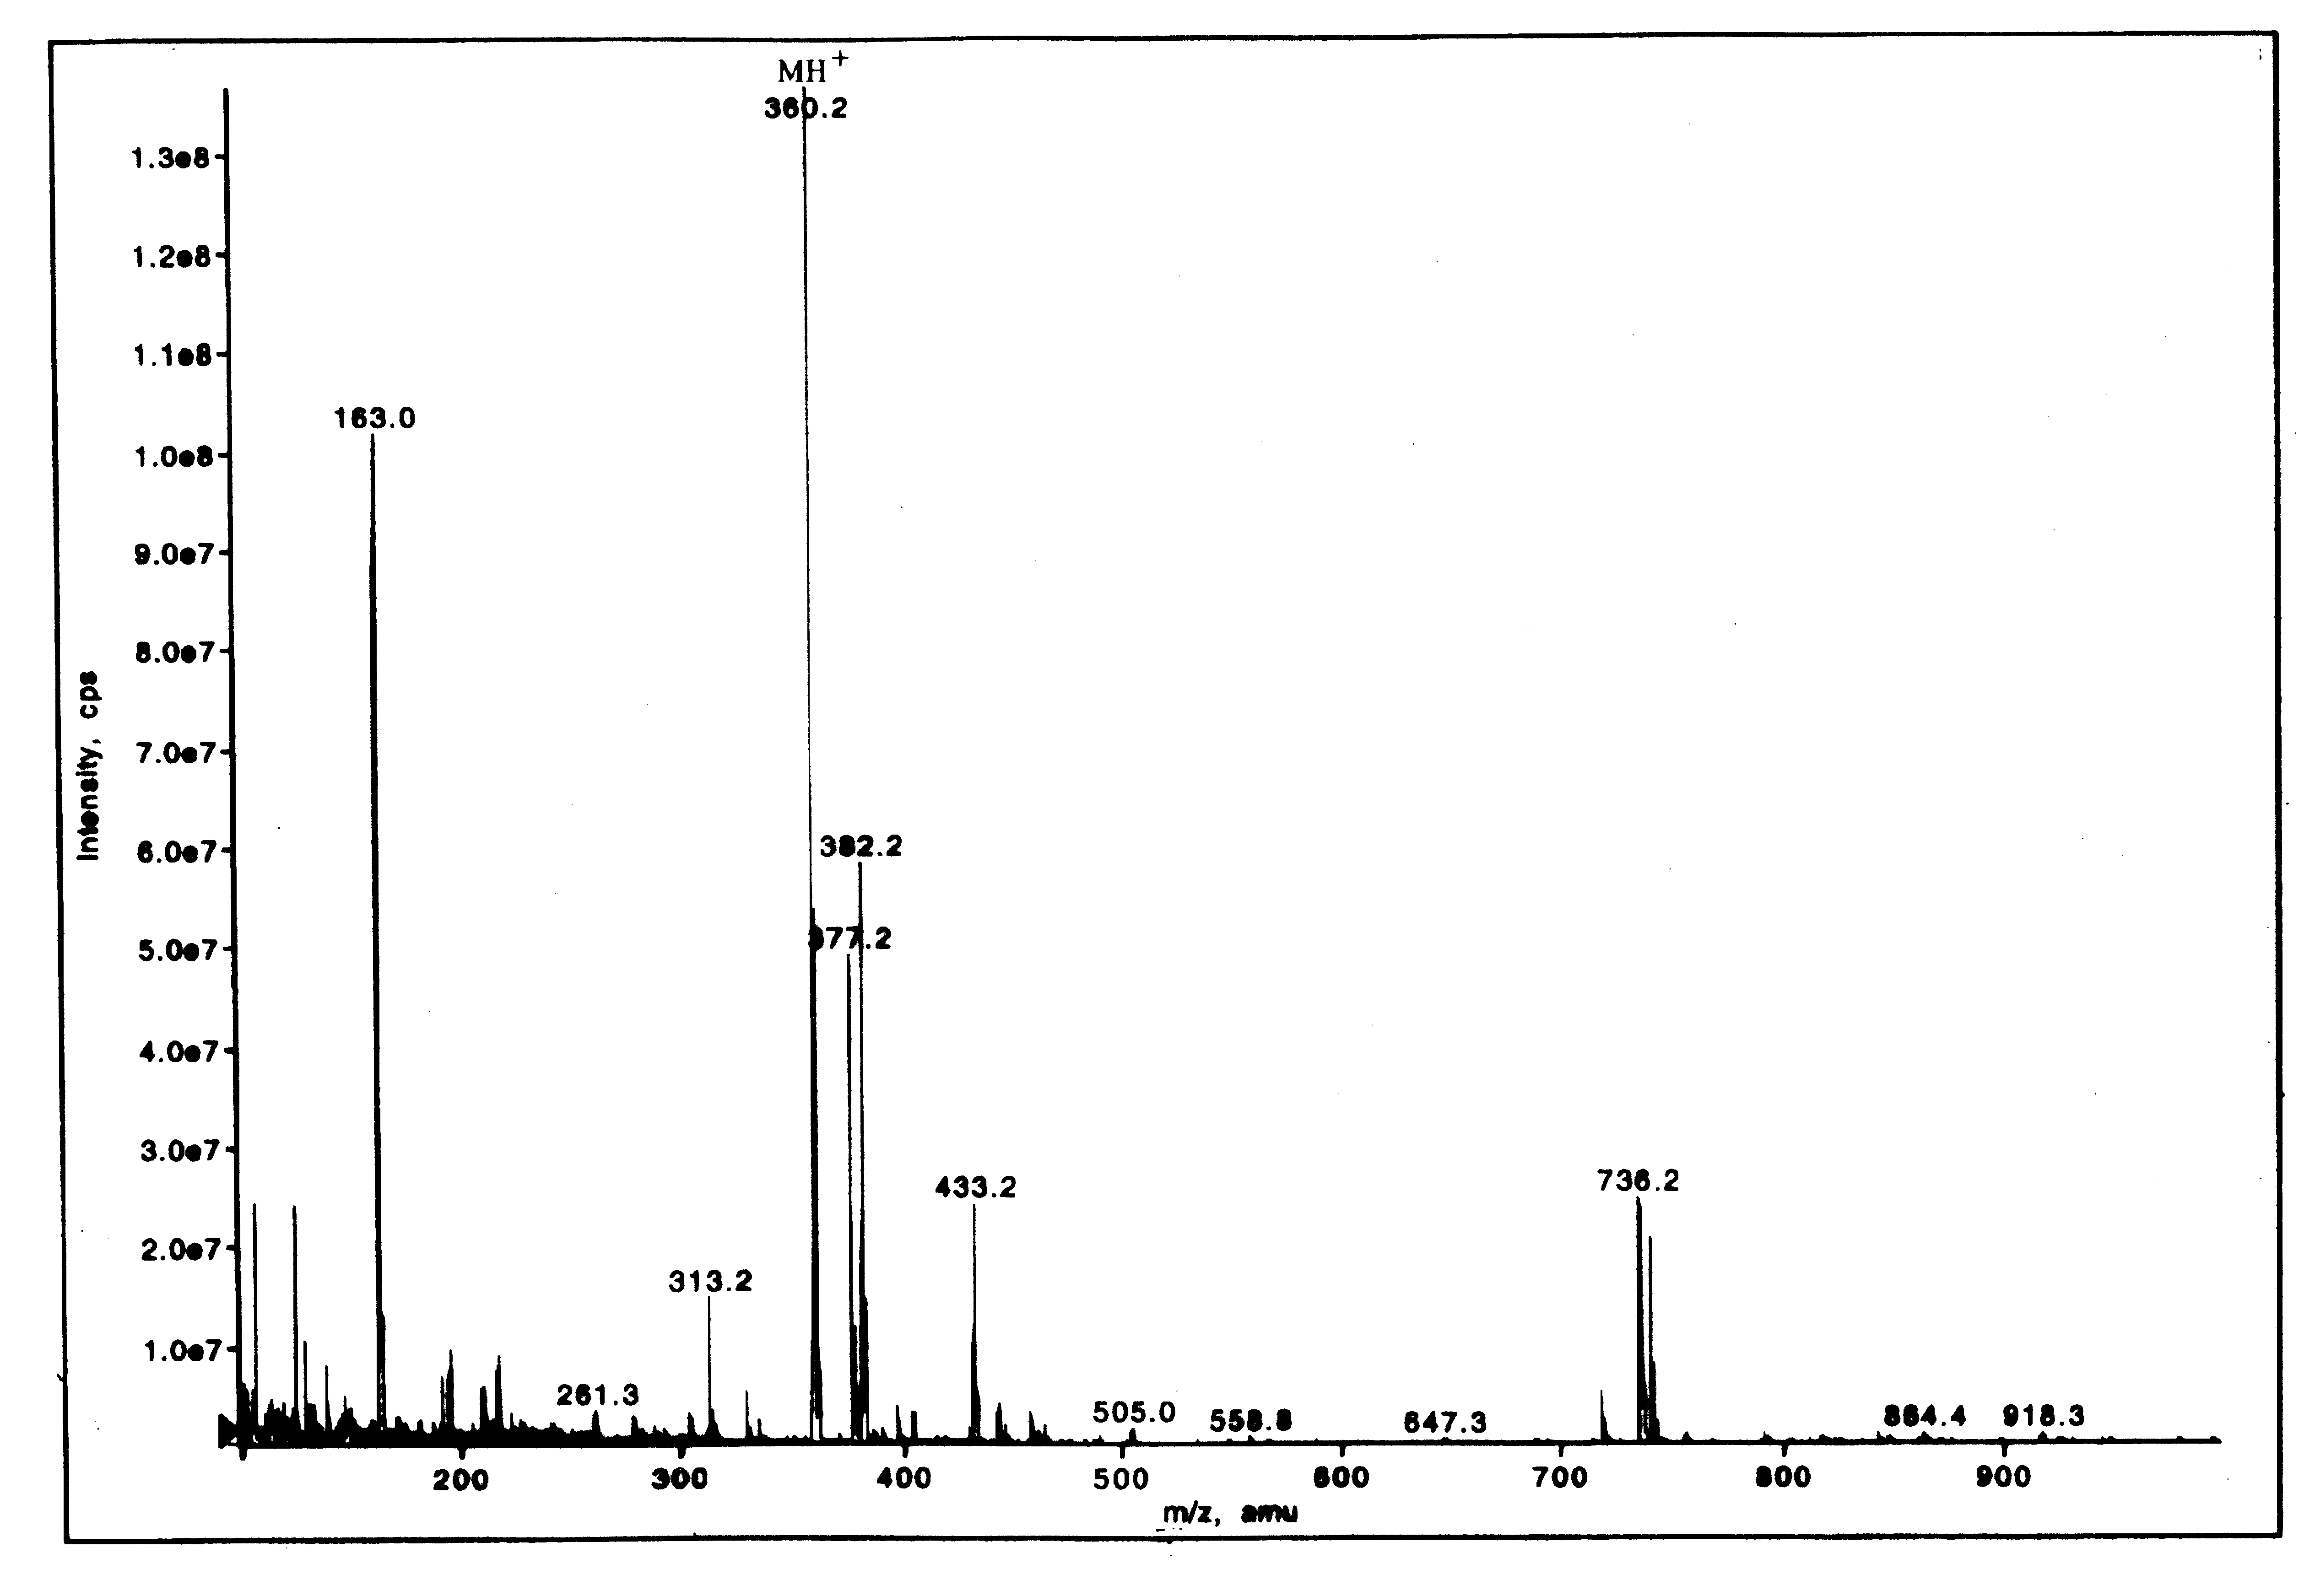


Figure 3: MALDI – MS mass spectrum of the trpepetide
